# Supplementary material
Source: publisher figshare collection journal article supplement (https://acs.figshare.com/ndownloader/files/13193387)
Supplement: Supplementary file 1 [file 13193387]

## *Supporting Information*

# **The Impact of Carbon Support Functionalization on the Electrochemical Stability of Pt Fuel Cell Catalysts**

*Henrike Schmies<sup>1</sup>, Elisabeth Hornberger<sup>1</sup>, Björn Anke<sup>2</sup>, Tilman Jurzinsky<sup>3</sup>, Hong Nhan Nong<sup>1,5</sup>, Fabio Dionigi<sup>1</sup>, Stefanie Kühl<sup>1</sup>, Jakub Drnec<sup>4</sup>, Martin Lerch<sup>2</sup>, Carsten Cremers<sup>3</sup>, Peter Strasser<sup>1\*</sup>*

<sup>1</sup> Department of Chemistry, Chemical Engineering Division, Technical University of Berlin, Berlin, Germany

<sup>2</sup> Institute of Inorganic Chemistry, Technical University Berlin, Berlin, Germany

<sup>3</sup> Fraunhofer-Institut für Chemische Technologie ICT, Pfinztal, Germany

<sup>4</sup> European Synchrotron Radiation Facility (ESRF), Grenoble, France

<sup>5</sup> Max Planck Institute for Chemical Energy Conversion, Stiftstr. 34-36, 45470 Mülheim an der Ruhr, Germany

\*Email: [pstrasser@tu-berlin.de](mailto:pstrasser@tu-berlin.de)

**Table S1.** Elemental bulk and surface composition in at% of unmodified Vulcan, O-Vulcan and N-Vulcan 400°C and 800°C from elemental analysis, hot gas extraction and XPS.

| [at%]                 | N<br>bulk from<br>elemental<br>analysis | C<br>bulk from<br>elemental<br>analysis | H<br>bulk from<br>elemental<br>analysis | N<br>bulk from<br>hot gas<br>extraction | O<br>bulk from<br>hot gas<br>extraction | N<br>surface<br>from<br>XPS | O<br>surface<br>from<br>XPS | C<br>surface<br>from<br>XPS | Ti<br>(substrate)<br>surface<br>from XPS |
|-----------------------|-----------------------------------------|-----------------------------------------|-----------------------------------------|-----------------------------------------|-----------------------------------------|-----------------------------|-----------------------------|-----------------------------|------------------------------------------|
| Vulcan                | 0.00                                    | 98.10                                   | 0.00                                    | -                                       | -                                       | 0                           | 5.84                        | 92.16                       | 2.00                                     |
| O-<br>Vulcan          | 0.19                                    | 85.58                                   | 0.38                                    | 0.268                                   | 12.6                                    | 0.73                        | 12.61                       | 86.15                       | 0.51                                     |
| N-<br>Vulcan<br>400°C | 2.53                                    | 93.26                                   | 0.13                                    | 2.5                                     | 2.9                                     | 3.86                        | 9.35                        | 83.35                       | 3.44                                     |
| N-<br>Vulcan<br>800°C | 1.53                                    | 95.08                                   | 0.02                                    | 1.8                                     | 0.85                                    | 2.26                        | 7.3                         | 87.38                       | 3.07                                     |

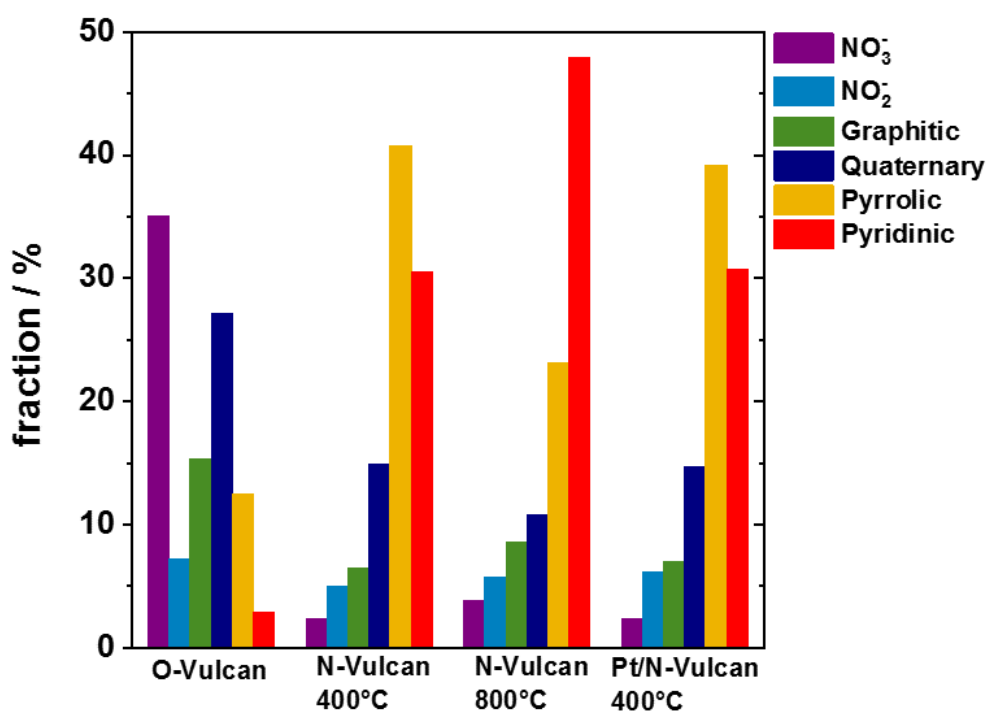

**Figure S1.** Fractions of the different N-moieties from deconvolution of the N 1s spectra in the modified carbons and in Pt/N-Vulcan 400°C.

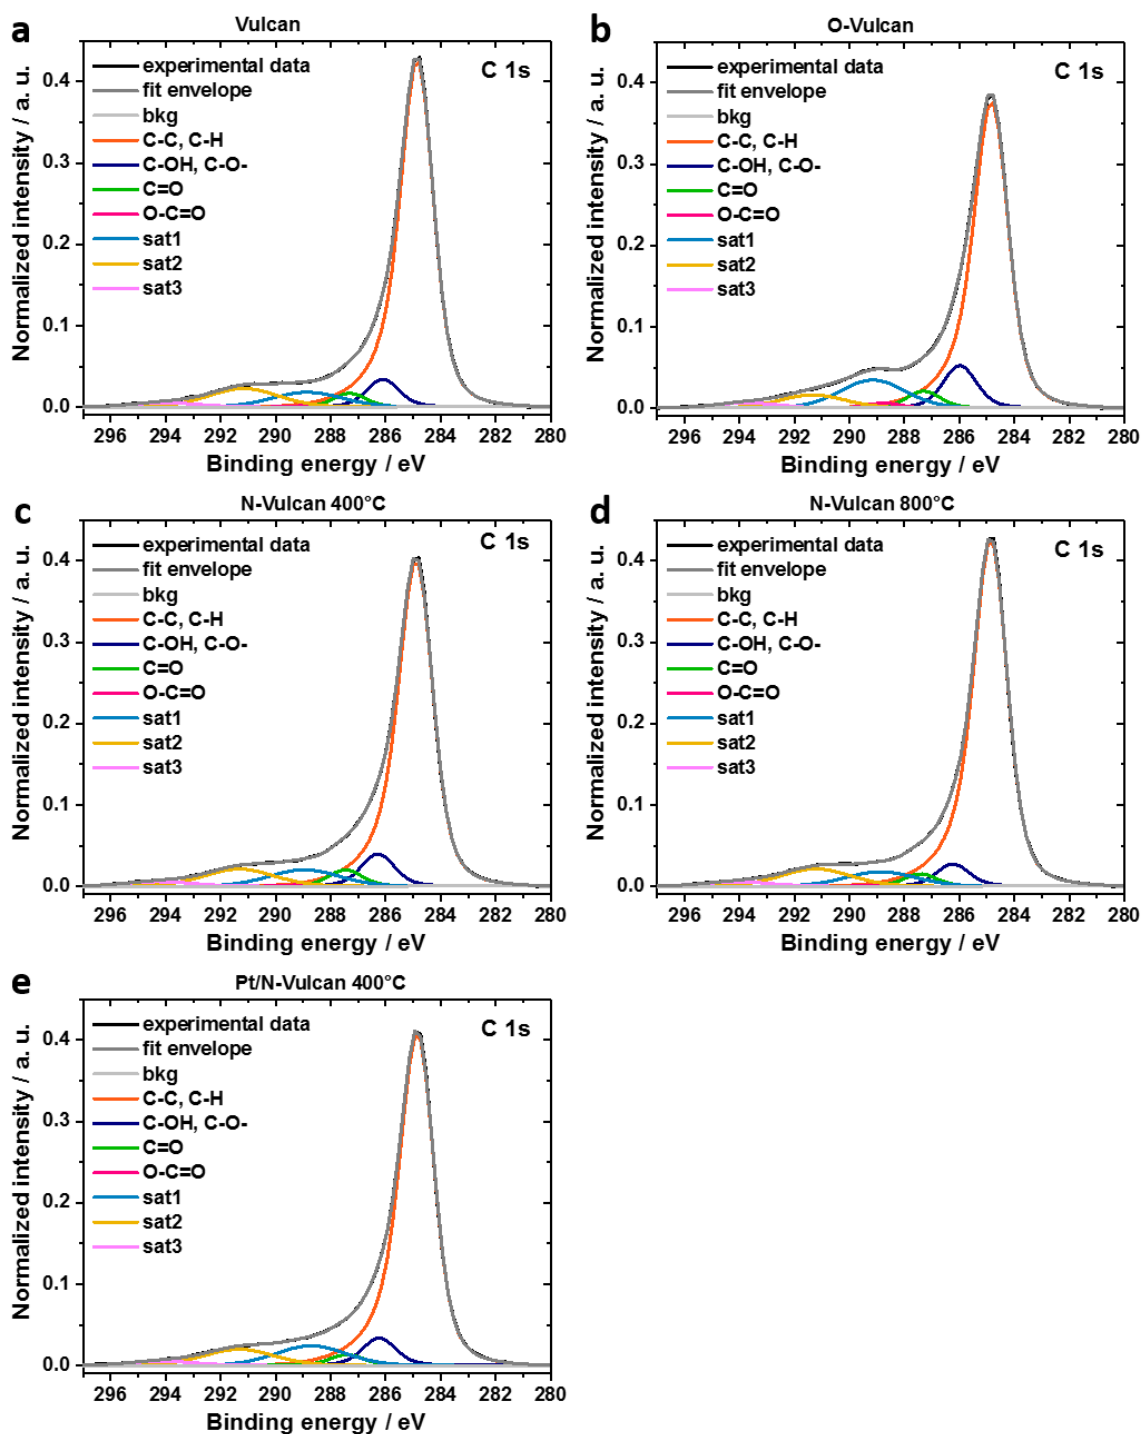

**Figure S2.** XPS C 1s spectra and individual peak deconvolution for unmodified Vulcan (a), O-Vulcan (b), N-Vulcan 400° (c), N-Vulcan 800°C (d) and for Pt/N-Vulcan 400°C (e).

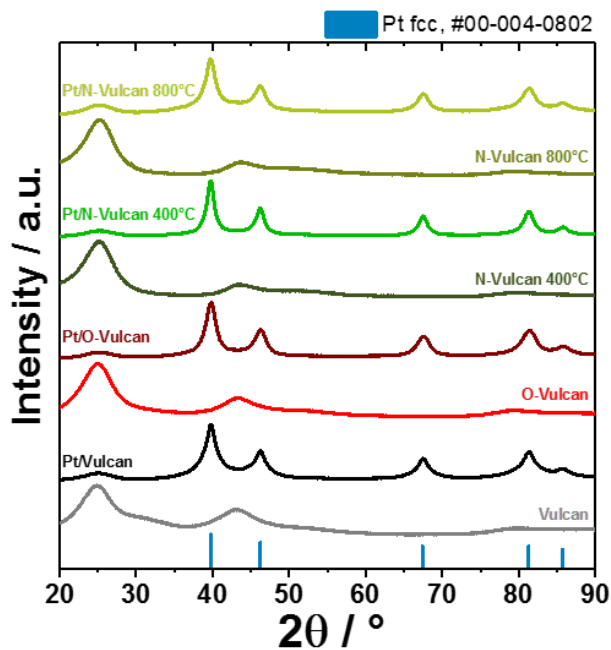

**Figure S3.** X-ray powder diffraction patterns of the modified and unmodified carbon supports and the respective Pt electrocatalysts. Vertical blue lines represent the reference pattern for fcc Pt (PDF#00-004-0802).

**Table S2.** Pt weight loading (wt%) from ICP-OES.

|                   | wt%  |
|-------------------|------|
| Pt/Vulcan         | 20.1 |
| Pt/O-Vulcan       | 23.1 |
| Pt/N-Vulcan 400°C | 19.8 |
| Pt/N-Vulcan 800°C | 20.9 |

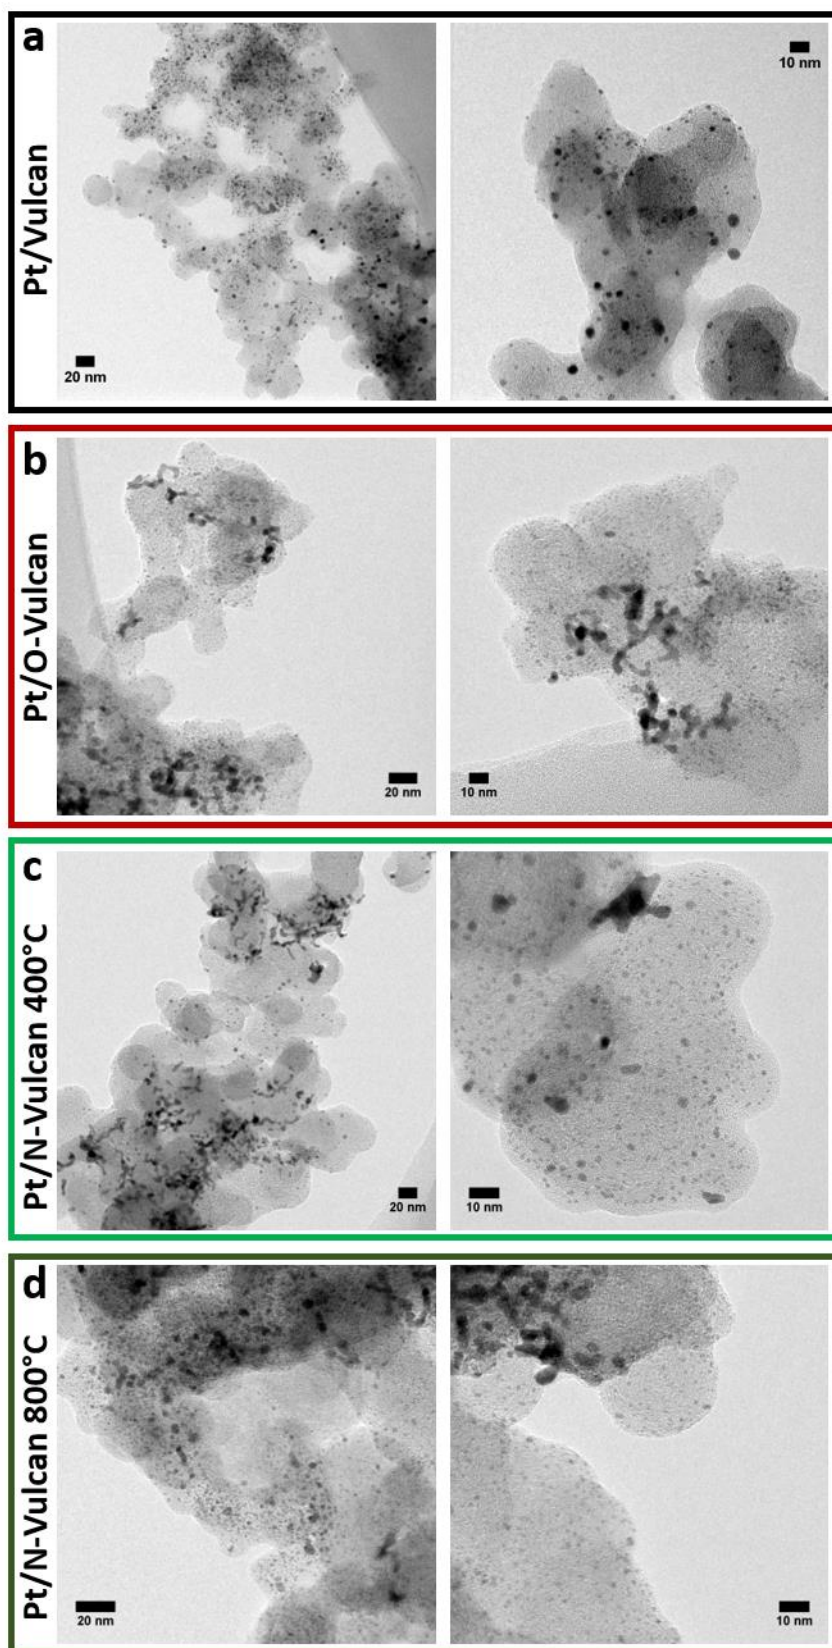

**Figure S4.** TEM images for Pt on unmodified Vulcan (a), O-Vulcan (b), N-Vulcan 400°C (c), and N-Vulcan 800°C (d).

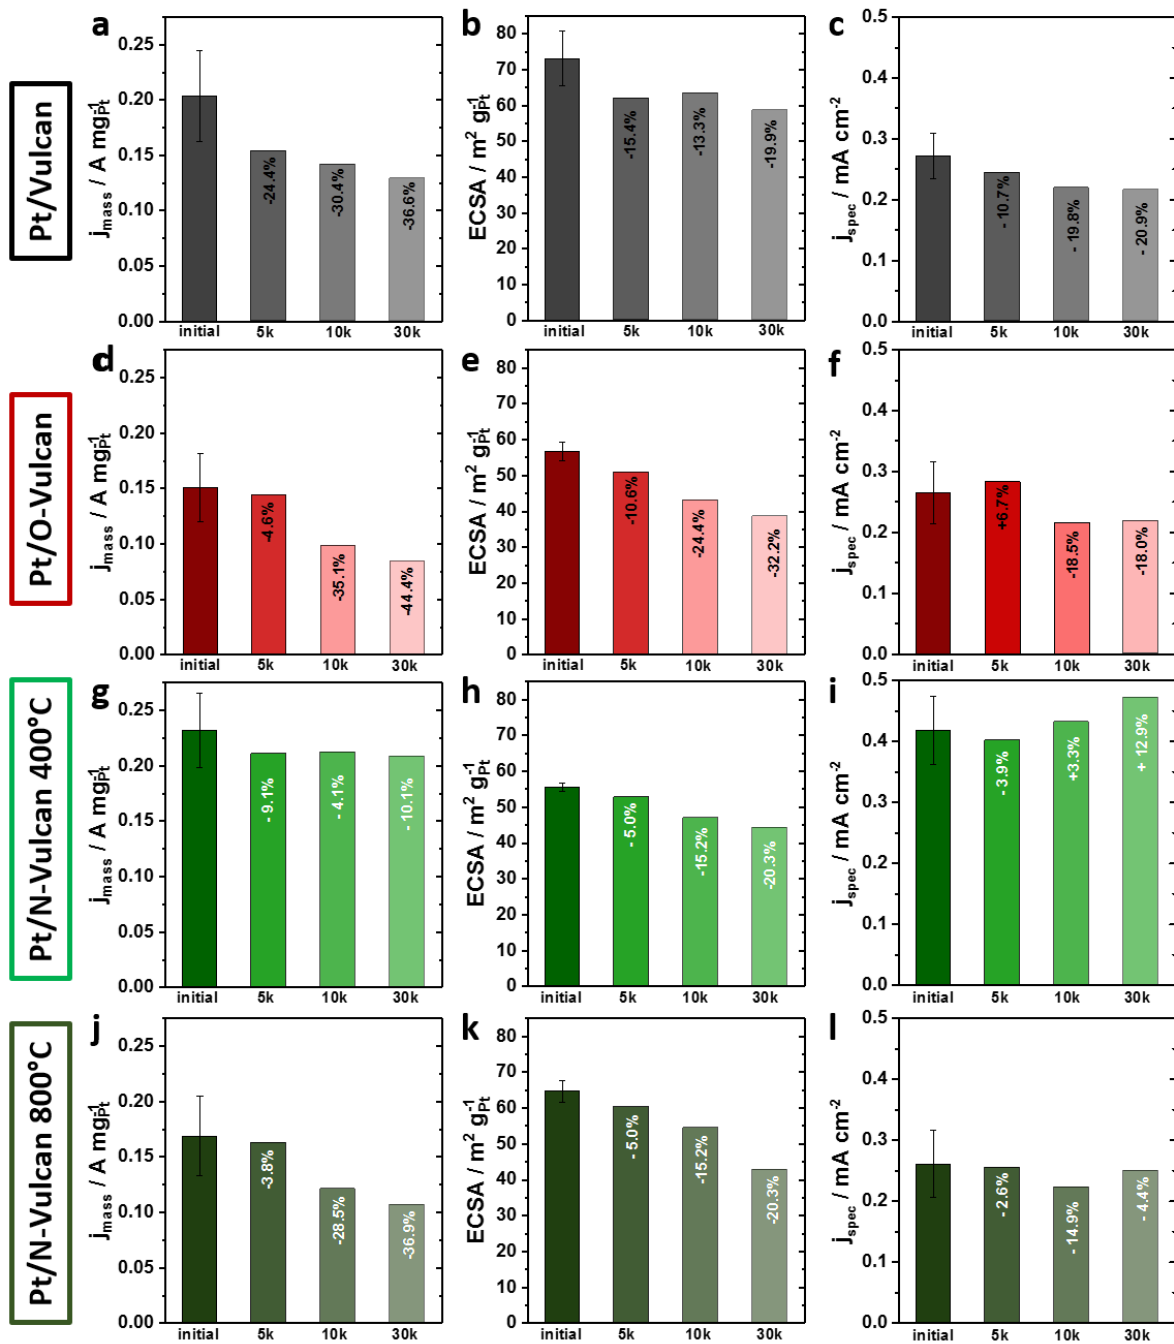

**Figure S5.** Results from AST for 5k, 10k and 30k cycles from 0.6-0.95 V in Nitrogen-saturated 0.1 M HClO<sub>4</sub> for Pt/Vulcan, Pt/O-Vulcan, Pt/N-Vulcan 400°C and Pt/N-Vulcan 800°C as a function of mass activity at 0.9 V  $j_{mass}$ (a,d,g,j), ECSA (b,e,h,k) and specific activity  $j_{spec}$  (c,f,i,l).

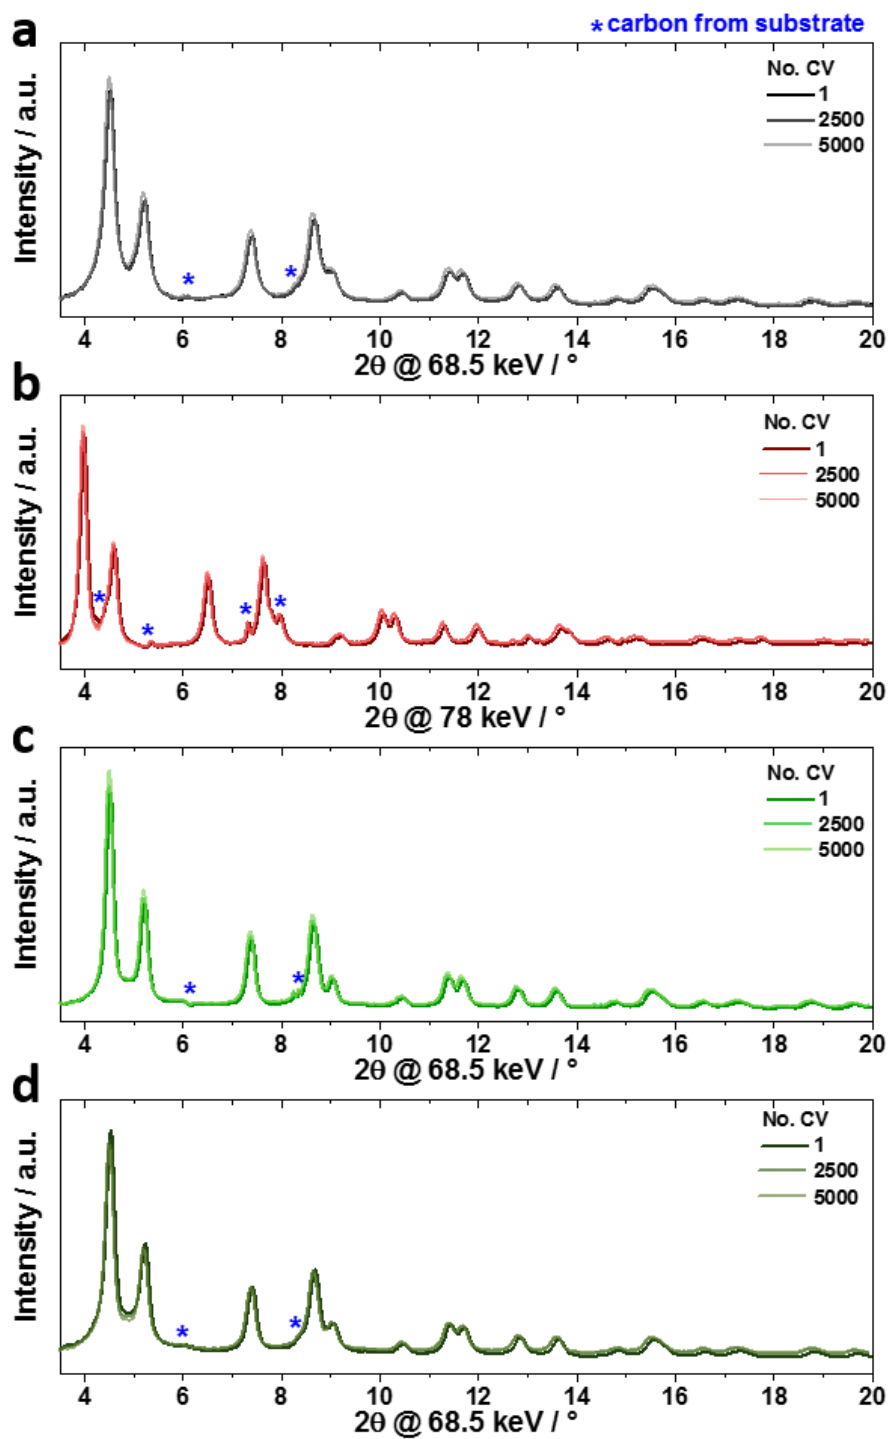

**Figure S6.** *In situ* high energy X-ray diffraction patterns over 5k cycle of the AST for Pt/Vulcan (a), Pt/O-Vulcan (b), Pt/N-Vulcan 400°C (c) and Pt/N-Vulcan 800°C (d).

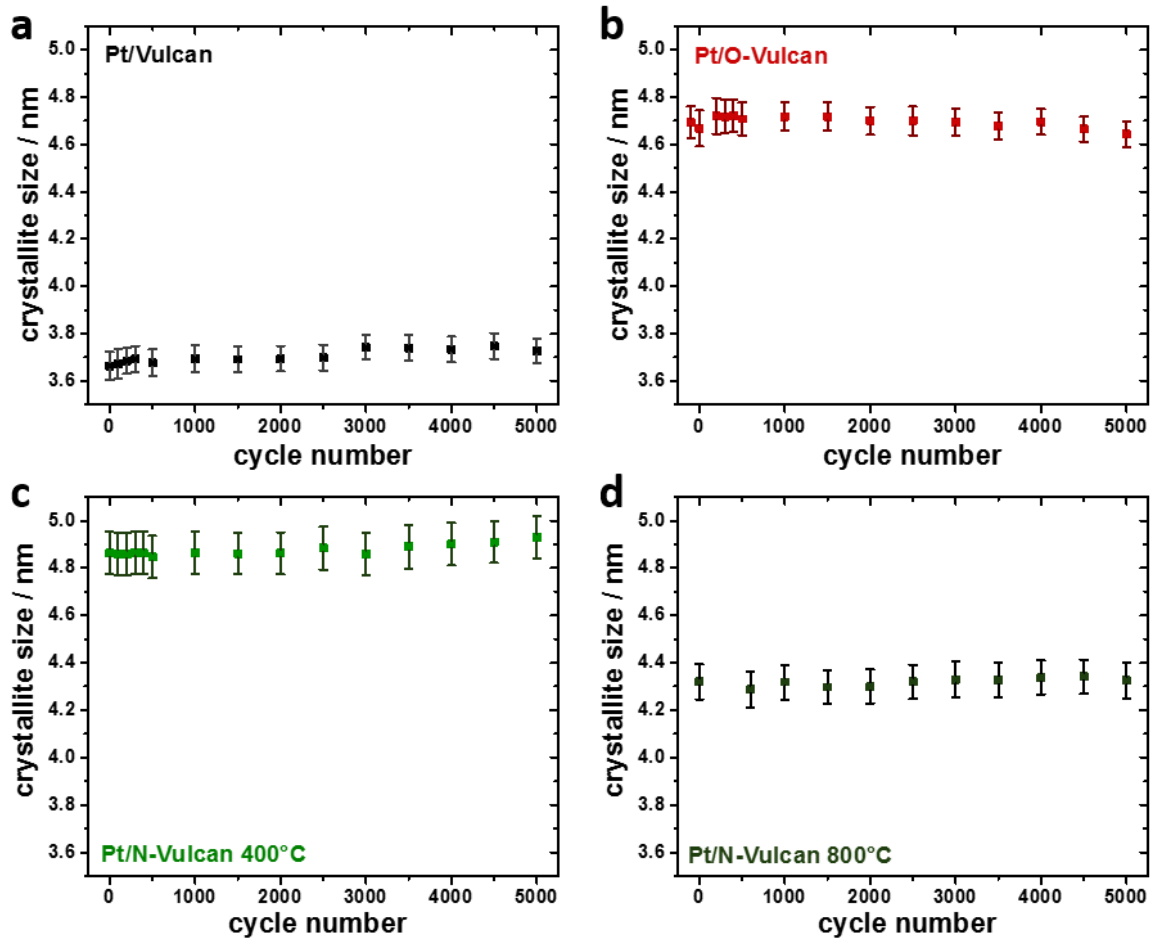

**Figure S7.** Crystallite size from Rietveld refinement of the *in situ* high energy X-ray diffraction patterns over 5k cycle of the AST for Pt/Vulcan (a), Pt/O-Vulcan (b), Pt/N-Vulcan 400°C (c) and Pt/N-Vulcan 800°C (d).



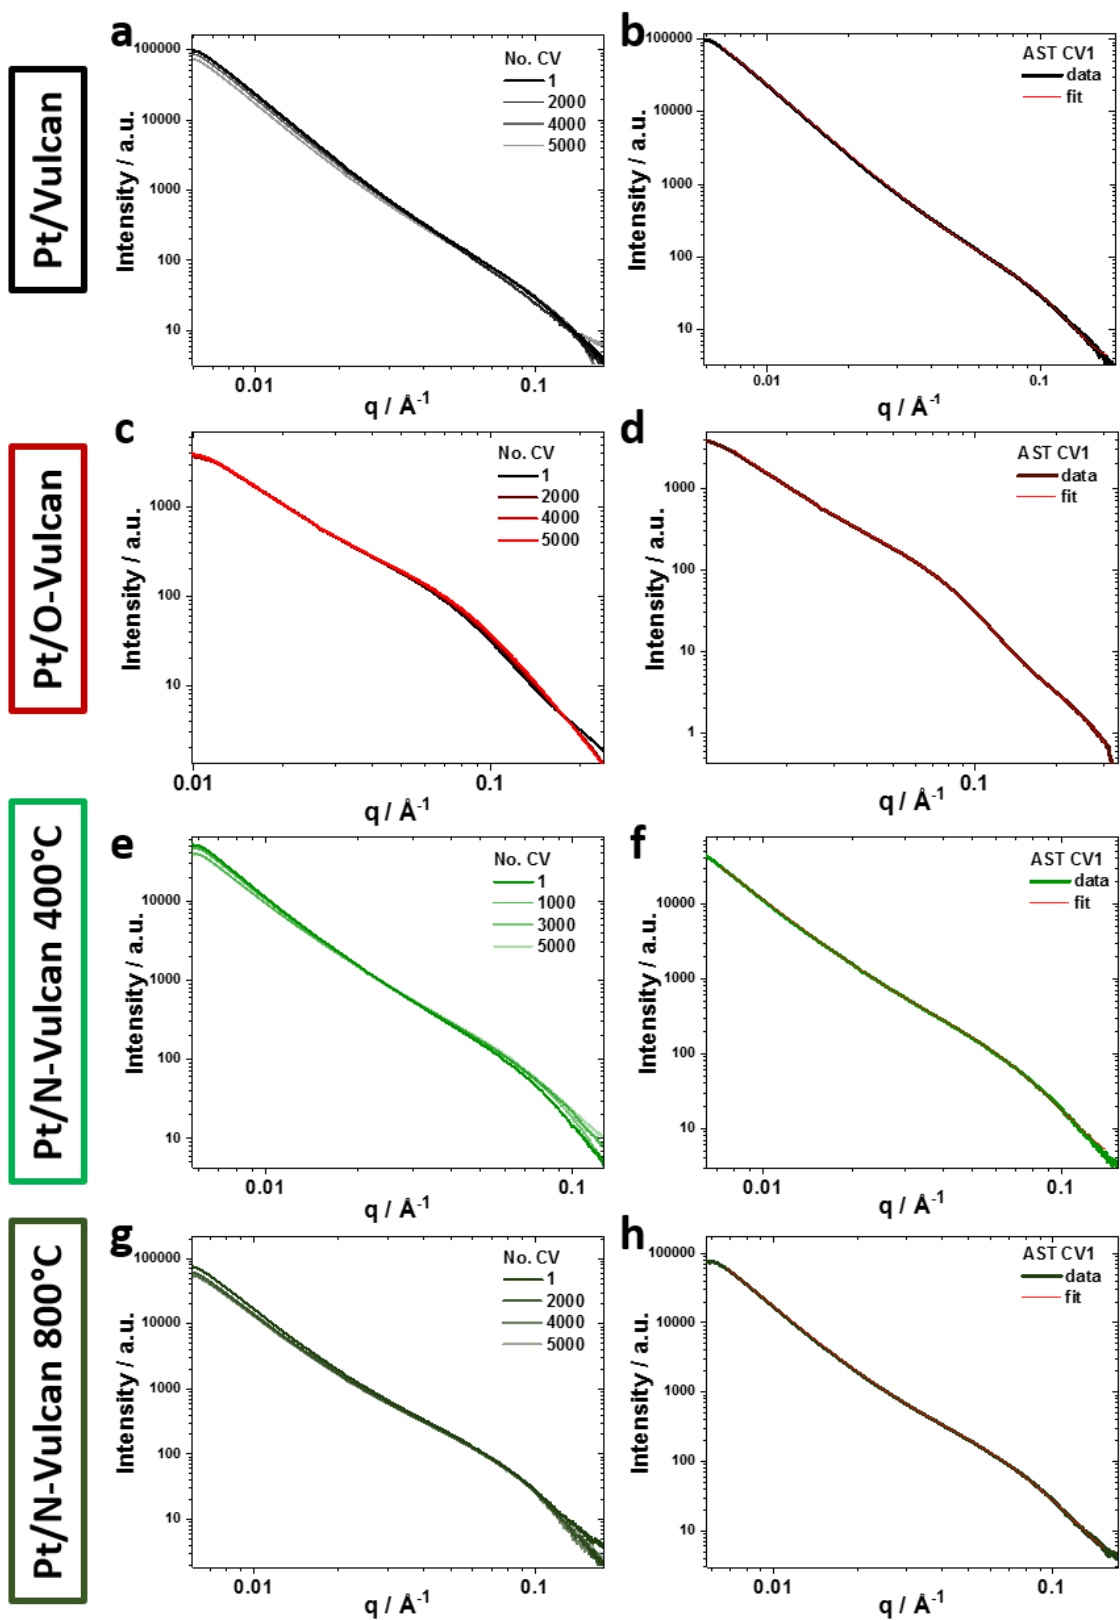

**Figure S8.** *In situ* small angle X-ray scattering curves over 5k cycle of the AST for Pt/Vulcan, Pt/O-Vulcan, Pt/N-Vulcan 400°C and Pt/N-Vulcan 800°C (a,c,e,g) and scattering curves at start of the AST including the individual fit curves (b,d,f,h).

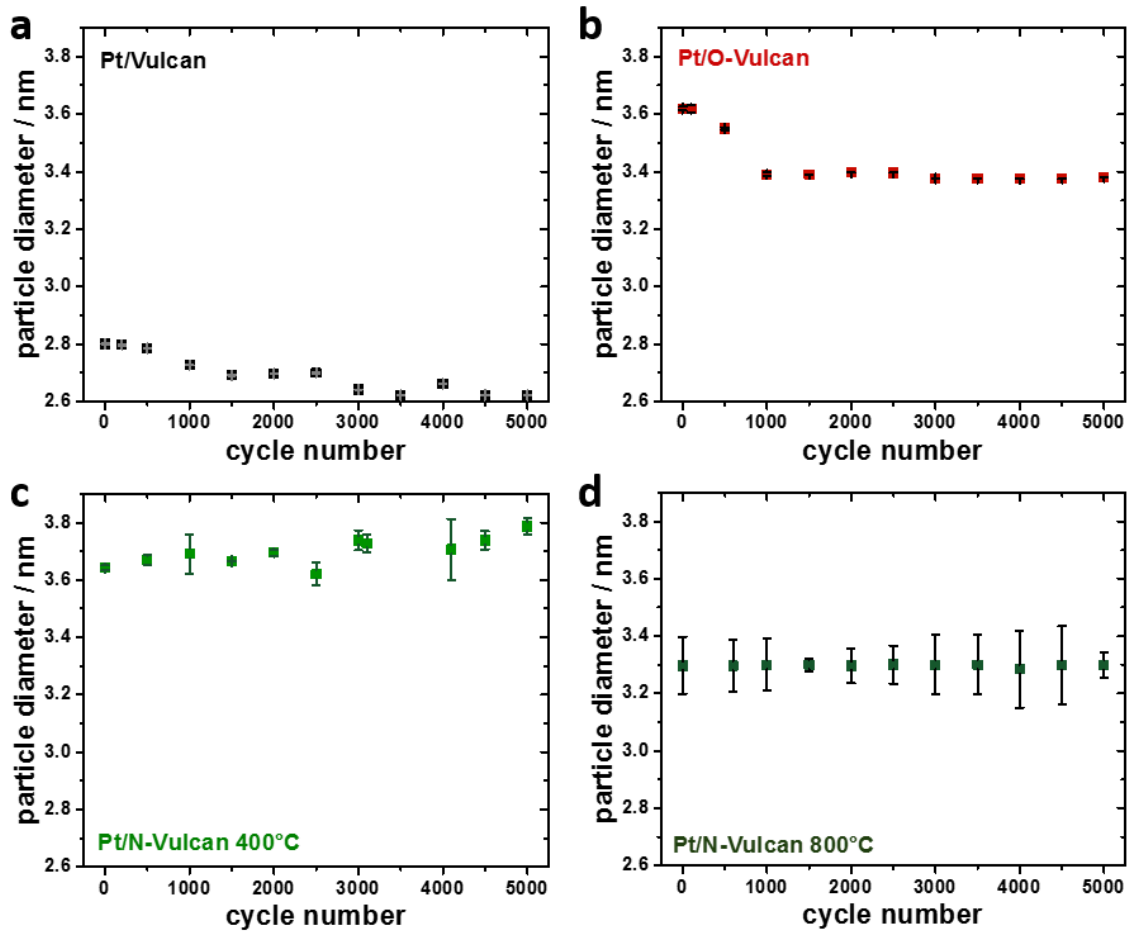

**Figure S9.** Mean particle diameter from fit of the *in situ* small angle X-ray scattering curves over 5k cycle of the AST for Pt/Vulcan (a), Pt/O-Vulcan (b), Pt/N-Vulcan 400°C (c) and Pt/N-Vulcan 800°C (d).
